# Supplementary material for: An early life observational cohort in China: Bone And MicroBiOme Onset (BAMBOO) study
Source: Research Square preprint supplement (doi:10.21203/rs.3.rs-2585913/v1), 2023-03-07
Supplement: Supplementary file 1 [file 3d7168af0e9a058c5938e7eb.docx]

**An early life observational cohort in China: Bone And MicroBiOme Onset (BAMBOO) study**

**Supplementary Table S1 Separation gradient of chromatographic separation**

| Time (min) | Flow rate (mL/min) | Mobile phase A (%) | Mobile phase B (%) |
| --- | --- | --- | --- |
| 0 | 0.300 | 74.0 | 26.0 |
| 0.50 | 0.300 | 74.0 | 26.0 |
| 5.00 | 0.300 | 76.0 | 24.0 |
| 6.00 | 0.300 | 80.0 | 20.0 |
| 13.00 | 0.300 | 82.0 | 18.0 |
| 13.01 | 0.300 | 74.0 | 26.0 |

**Supplementary Table S2 Compound parameters of mass spectrometric detection**

| Analyte | Transition Reactions (m/z) used for Quantification |
| --- | --- |
| D3-PTAD | 560.31 →298.1 |
| 25-OHD3-PTAD | 558.31 →298.1 |
| D3- d3-PTAD | 563.31 →301.1 |
| 25-OHD3-d6-PTAD | 564.41 →298.0 |
